# Supplementary material
Source: publisher site journal article supplement (https://www.dovepress.com/article/337516)
Supplement: Supplementary file 1 [file get_supplementary_file.php]

**Supplementary figure and table legends**


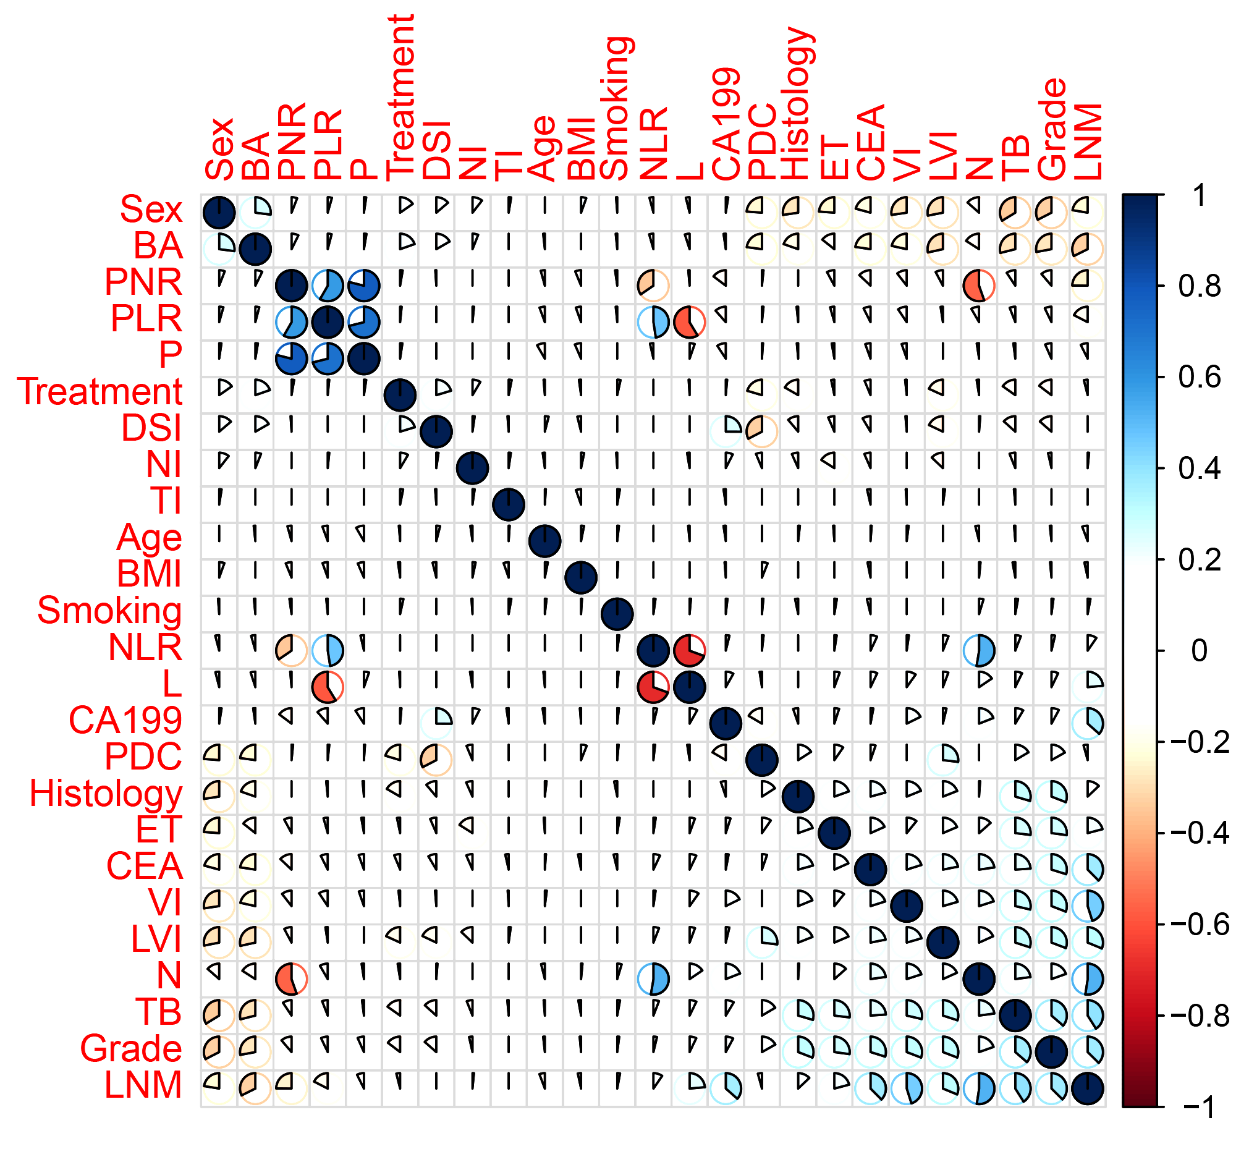


Supplementary figure1. Correlation matrix between LNM and candidate variables.

Abbreviations: BA: background adenoma. PNR: platelet-to- neutrophil ratio. PLR: platelet-to-lymphocyte ratio. P: platelet count. DSI: depth of submucosal invasion. NI: nerve infiltration. TI: tumor site. BMI: body mass index. NLR: neutrophil-to-lymphocyte ratio. L: lymphocyte count. CA199: carbohydrate antigen199. PDC: poorly differentiated clusters. ET: endoscope type. CEA: carcinoembryonic antigen. VI: venous invasion. LVI: lymphatic vascular invasion. N: neutrophil count. TB: tumor budding. LNM: lymph node metastasis.

Note. Red indicates positive correlation, blue indicates negative correlation, and the depth of color indicates the degree of correlation.

Supplementary table1. Baseline demographic and clinical characteristics of the external study cohort.

| **Variables** | **Subgroups** | **Overall** | **LNM(+)** | **LNM(-)** | ***P*-value** |
| --- | --- | --- | --- | --- | --- |
| **N=717** | **N=662** | **N=55** |
| Sex (%) | Female | 159 (22.2) | 131 (19.8) | 28 (50.9) | <0.001 |
|  | Male | 558 (77.8) | 531 (80.2) | 27 (49.1) |  |
| Age,y |  | 49.00 [33.00, 62.00] | 49.00 [34.00, 62.75] | 43.00 [30.00, 53.00] | 0.028 |
| BMI,kg/m2 |  | 24.40 [21.30, 27.80] | 24.60 [21.30, 27.90] | 23.90 [21.95, 25.15] | 0.19 |
| Smoking (%) | No | 354 (49.4) | 330 (49.8) | 24 (43.6) | 0.456 |
|  | Yes | 363 (50.6) | 332 (50.2) | 31 (56.4) |  |
| Tumor site (%) | Colon | 326 (45.5) | 300 (45.3) | 26 (47.3) | 0.889 |
|  | Rectum | 391 (54.5) | 362 (54.7) | 29 (52.7) |  |
| Endoscope type (%) | Non-polypoid | 61 (8.5) | 48 (7.3) | 13 (23.6) | <0.001 |
|  | Polypoid | 656 (91.5) | 614 (92.7) | 42 (76.4) |  |
| Treatment (%) | Endoscopic+surgery | 230 (32.1) | 206 (31.1) | 24 (43.6) | 0.078 |
|  | Endoscopic | 487 (67.9) | 456 (68.9) | 31 (56.4) |  |
| Grade (%) | High | 166 (23.2) | 122 (18.4) | 44 (80.0) | <0.001 |
|  | Low | 551 (76.8) | 540 (81.6) | 11 (20.0) |  |
| Histology (%) | ADE | 578 (80.6) | 541 (81.7) | 37 (67.3) | 0.015 |
|  | M-ADE | 139 (19.4) | 121 (18.3) | 18 (32.7) |  |
| DSI (%) | sm1 | 300 (41.8) | 279 (42.1) | 21 (38.2) | 0.775 |
|  | sm2 | 295 (41.1) | 272 (41.1) | 23 (41.8) |  |
|  | sm3 | 122 (17.0) | 111 (16.8) | 11 (20.0) |  |
| Background adenoma (%) | No | 228 (31.8) | 181 (27.3) | 47 (85.5) | <0.001 |
|  | Yes | 489 (68.2) | 481 (72.7) | 8 (14.5) |  |
| Lymphovascular invasion (%) | No | 483 (67.4) | 469 (70.8) | 14 (25.5) | <0.001 |
|  | Yes | 234 (32.6) | 193 (29.2) | 41 (74.5) |  |
| Venous  invasion (%) | No | 547 (76.3) | 540 (81.6) | 7 (12.7) | <0.001 |
|  | Yes | 170 (23.7) | 122 (18.4) | 48 (87.3) |  |
| Lymphatic vascular invasion (%) | No | 123 (17.2) | 115 (17.4) | 8 (14.5) | 0.728 |
|  | Yes | 594 (82.8) | 547 (82.6) | 47 (85.5) |  |
| Tumor budding (%) | No | 561 (78.2) | 551 (83.2) | 10 (18.2) | <0.001 |
|  | Yes | 156 (21.8) | 111 (16.8) | 45 (81.8) |  |
| Poorly differentiated clusters (%) | High | 229 (31.9) | 204 (30.8) | 25 (45.5) | 0.041 |
|  | Low | 251 (35.0) | 239 (36.1) | 12 (21.8) |  |
|  | None | 237 (33.1) | 219 (33.1) | 18 (32.7) |  |
| CA199 (%),U/ml |  | 31.00 [17.00, 45.00] | 34.00 [22.00, 40.00] | 37.00 [32.00, 44.00] | <0.001 |
| CEA (%),ng/ml |  | 2.26 [1.53, 2.71] | 2.21 [1.32, 2.68] | 2.33 [1.63, 3.25] | <0.001 |
| Neutrophil count,10^9 |  | 3.02 [2.28, 3.61] | 2.92 [2.22, 3.48] | 4.78 [3.93, 5.24] | <0.001 |
| Lymphocyte count, 10^9 |  | 1.75 [1.26, 2.20] | 1.67 [1.23, 2.18] | 2.12 [1.85, 2.38] | <0.001 |
| Platelet count, 10^9 |  | 173.00 [119.00, 236.00] | 173.00 [120.00, 240.00] | 166.00 [108.00, 206.00] | 0.077 |
| NLR |  | 1.72 [1.35, 2.33] | 1.69 [1.32, 2.30] | 2.17 [1.78, 2.62] | <0.001 |
| PLR |  | 102.20 [67.36, 138.12] | 104.10 [71.31, 144.39] | 75.00 [50.34, 105.90] | <0.001 |
| PNR |  | 58.33 [39.43, 82.50] | 61.17 [40.96, 85.73] | 34.35 [22.44, 44.32] | <0.001 |

Abbreviations: BMI:body mass index. ADE: adenocarcinoma. M-ADE: mucinous adenocarcinoma. DSI: depth of submucosal invasion. CA199: carbohydrate antigen199. CEA: carcinoembryonic antigen. NLR: neutrophil-to-lymphocyte ratio. PLR: platelet-to-lymphocyte ratio. PNR: platelet-to- neutrophil ratio.

Supplementary table2. Gini index of LNM related candidate variables based on RFC model.

| **Variables** | **MeanDecreaseAccuracy** | **MeanDecreaseGini** |
| --- | --- | --- |
| Histology | 6.77443388 | 0.551657914 |
| Age | 6.250702616 | 2.969051892 |
| BMI | 4.462459119 | 2.07958569 |
| Smoking | 1.71598171 | 0.466709544 |
| ET | 6.159876056 | 0.664526221 |
| Treatment | 4.752885116 | 0.508082872 |
| Grade | 17.40859269 | 3.996292094 |
| Sex | 1.413631436 | 0.390074695 |
| CA199 | 10.55670207 | 1.005791491 |
| BA | 20.17945905 | 3.406314827 |
| LVI | 16.39007168 | 2.846684564 |
| VI | 42.56814948 | 11.53973119 |
| TB | 28.87613519 | 6.947911058 |
| PDC | 28.37092142 | 3.488373535 |
| DSI | 53.82102761 | 14.2305125 |
| NLR | 37.36121079 | 9.361479127 |
| CEA | 14.9585753 | 3.09574393 |
| PLR | 14.44449588 | 3.811617879 |
| PNR | 27.50365588 | 8.801567294 |

Abbreviations: BA: background adenoma. PNR: platelet-to- neutrophil ratio. PLR: platelet-to-lymphocyte ratio. DSI: depth of submucosal invasion. BMI: body mass index. NLR: neutrophil-to-lymphocyte ratio. CA199: carbohydrate antigen199. PDC: poorly differentiated clusters. ET: endoscope type. CEA: carcinoembryonic antigen. VI: venous invasion. LVI: lymphatic vascular invasion. TB: tumor budding.

Supplementary table3. Predictive performance of different models related to LNM in patients with pT1NxM0 CRC

| GLM | Multivariate analysis | | Discrimination | | | |
| --- | --- | --- | --- | --- | --- | --- |
| OR(95%CI) | P-value | Brier | R2 | C-index | AIC |
| **Model1**  PDC  (High vs Low) | 1.36(0.91-1.81) | 0.03 |  |  |  |  |
| NLR  (＜1.75 vs ≥1.75) | 2.03(1.62-2.44) | 0.02 | 0.06 | 0.07 | 0.772 | 296.31 |
| BA  (Yes vs No) | 0.43(0.08-0.78) | <0.01 |  |  |  |  |
| PLR  (＜106.40 vs ≥106.40) | 1.15(0.82-1.48) | <0.01 |  |  |  |  |
| TB  (Yes vs No) | 1.63(1.20-2.06) | 0.02 |  |  |  |  |
| VI  (Yes vs No) | 7.36(6.84-7.88) | <0.01 |  |  |  |  |
| DSI |  |  |  |  |  |  |
| (sm1 vs sm2+sm3) | 2.67(2.24-3.10) | <0.01 |  |  |  |  |
| **Model2** |  |  |  |  |  |  |
| PDC  (High vs Low) | 1.37(0.99-1.74) | 0.01 |  |  |  |  |
| NLR  (＜1.75 vs ≥1.75) | 1.97(1.52-2.42) | <0.01 |  |  |  |  |
| PLR  (＜106.40 vs ≥106.40) | 1.69(1.26-2.12) | 0.02 | 0.06 | 0.08 | 0.762 | 325.51 |
| PNR  (＜60.35 vs ≥60.35) | 1.34(1.01-1.67) | 0.03 |  |  |  |  |
| CEA, ng/ml  (≤5.0 vs＞5.0) | 1.28(0.81-1.75) | 0.02 |  |  |  |  |
| **Model3** |  |  |  |  |  |  |
| PDC  (High vs Low) | 1.92(1.47-2.37) | 0.03 |  |  |  |  |
| NLR  (＜1.75 vs ≥1.75) | 1.58(1.03-2.13) | 0.02 |  |  |  |  |
| PLR  (＜106.40 vs ≥106.40) | 1.56(1.07-2.05) | 0.04 | 0.05 | 0.07 | 0.719 | 352.63 |
| CEA, ng/ml  (≤5.0 vs＞5.0) | 1.26(0.69-1.83) | 0.02 |  |  |  |  |
| CA199, U/ml  (≤37 vs ＞37) | 1.32(0.84-1.81) | 0.03 |  |  |  |  |

Abbreviations. AIC: Akaike information criterion. OR: odds ratio. 95%CI: 95% confidence level. BA: background adenoma. PLR: platelet-to-lymphocyte ratio. DSI: depth of submucosal invasion. NLR: neutrophil-to-lymphocyte ratio. PDC: poorly differentiated clusters. VI: venous invasion. TB: tumor budding. PNR: platelet-to- neutrophil ratio. CA199: carbohydrate antigen199. CEA: carcinoembryonic antigen.
